# Supplementary material for: A Polytherapy Strategy Using Vincristine and ALK Inhibitors to Sensitise EML4-ALK-Positive NSCLC
Source: Cancers (Basel). 2022 Feb 2;14(3):779. doi: 10.3390/cancers14030779 (PMC8833940; doi:10.3390/cancers14030779)
Supplement: Supplementary file 1 [file cancers-14-00779-s001.zip › cancers-1526055-supplementary.pdf]

## TABLES

Table S1. Compounds used and concentrations

| Compound    | Supplier          | Final concentration |
|-------------|-------------------|---------------------|
| Crizotinib  | Pfizer            | 400 nM              |
| Ceritinib   | Selleck Chemicals | 500 nM              |
| Vincristine | Selleck Chemicals | 20 nM               |
| Paclitaxel  | Selleck Chemicals | A range of doses    |

Table S2. Antibodies used for immunofluorescence (IF) and western blotting (WB) and dilutions

| Antibody                                    | Supplier                 | Identifier | IF dilution | WB dilution |
|---------------------------------------------|--------------------------|------------|-------------|-------------|
| Anti- $\alpha$ -tubulin mouse monoclonal    | SIGMA-ALDRICH            | T5168      | 1:1000      | 1:2000      |
| Anti- $\alpha$ -tubulin rabbit polyclonal   | Abcam                    | ab15246    | 1:800       | 1:2000      |
| Anti-GFP rabbit polyclonal                  | Abcam                    | ab6556     | 1:1000      | 1:1000      |
| Anti-GFP mouse monoclonal                   | Santa Cruz Biotechnology | sc-9996    | 1:1000      | 1:1000      |
| Anti-ALK (D5F3) rabbit monoclonal           | CST                      | 3633       | 1:100       | 1:1000      |
| Anti-ALK (31F12) mouse monoclonal           | CST                      | 3791       | 1:100       | 1:1000      |
| Anti- phospho ALK (Y1604) rabbit monoclonal | CST                      | 3341       |             | 1:1000      |
| Acetyl- $\alpha$ -tubulin mouse             | SIGMA-ALDRICH            | T7451      | 1:1000      | 1:2000      |
| Anti-STAT3 mouse monoclonal                 | CST                      | 9139       |             | 1:1000      |
| Anti-phospho STAT3 (Y705) rabbit monoclonal | CST                      | 9145       |             | 1:1000      |
| Anti-AKT rabbit monoclonal                  | CST                      | 9272       |             | 1:1000      |
| Anti-phospho AKT (S473) rabbit monoclonal   | CST                      | 9271       |             | 1:1000      |
| Anti-ERK rabbit monoclonal                  | CST                      | 9102       |             | 1:1000      |

|                                                |               |         |  |          |
|------------------------------------------------|---------------|---------|--|----------|
| Anti-phospho ERK (T202/Y204) rabbit monoclonal | CST           | 9101    |  | 1:1000   |
| Anti- $\beta$ -Actin mouse monoclonal          | Sigma-Aldrich | 5441    |  | 1:10,000 |
| Anti-GAPDH rabbit monoclonal                   | Abcam         | ab37168 |  | 1:2000   |

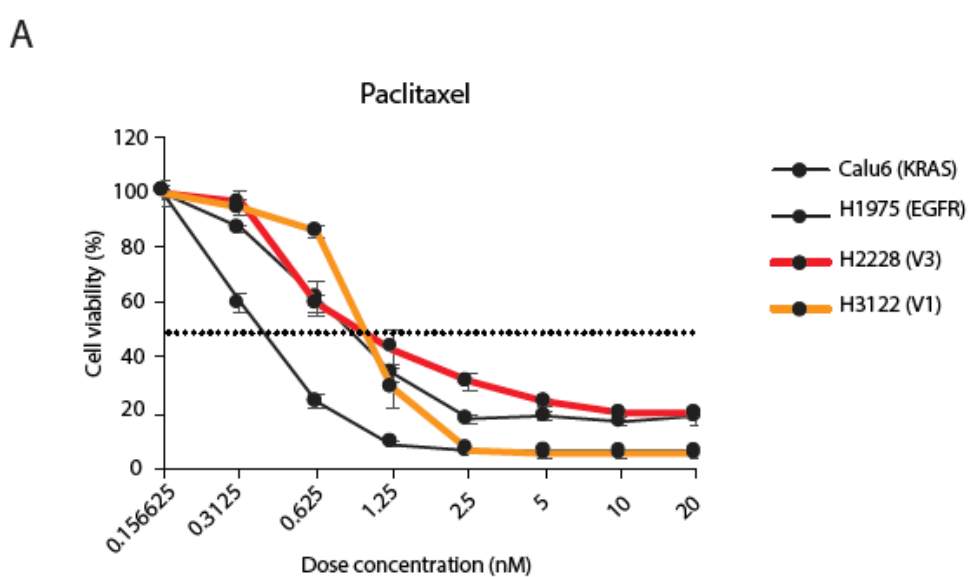

**B**

| Cell Lines | Major mutations  | IC <sub>50</sub> (nM) |
|------------|------------------|-----------------------|
|            |                  | Paclitaxel            |
| Calu6      | KRAS             | 0.97                  |
| H1975      | EGFR L858R/T790M | 0.41                  |
| H3122      | EML4-ALK V1      | 1.15                  |
| H2228      | EML4-ALK V3      | 1.18                  |

**Figure S1. Paclitaxel treatment of NSCLC cell lines**

**A.** NSCLC cell lines harbouring different genetic alterations were treated with increasing doses of paclitaxel for 72 hours. Cell viability was determined using CellTiter-Glo assays. Data represent the mean of three biological replicates in each column; the bars denote  $\pm$ SD. **B.** Table summarizes the IC<sub>50</sub> of paclitaxel treatment in NSCLC cell lines.

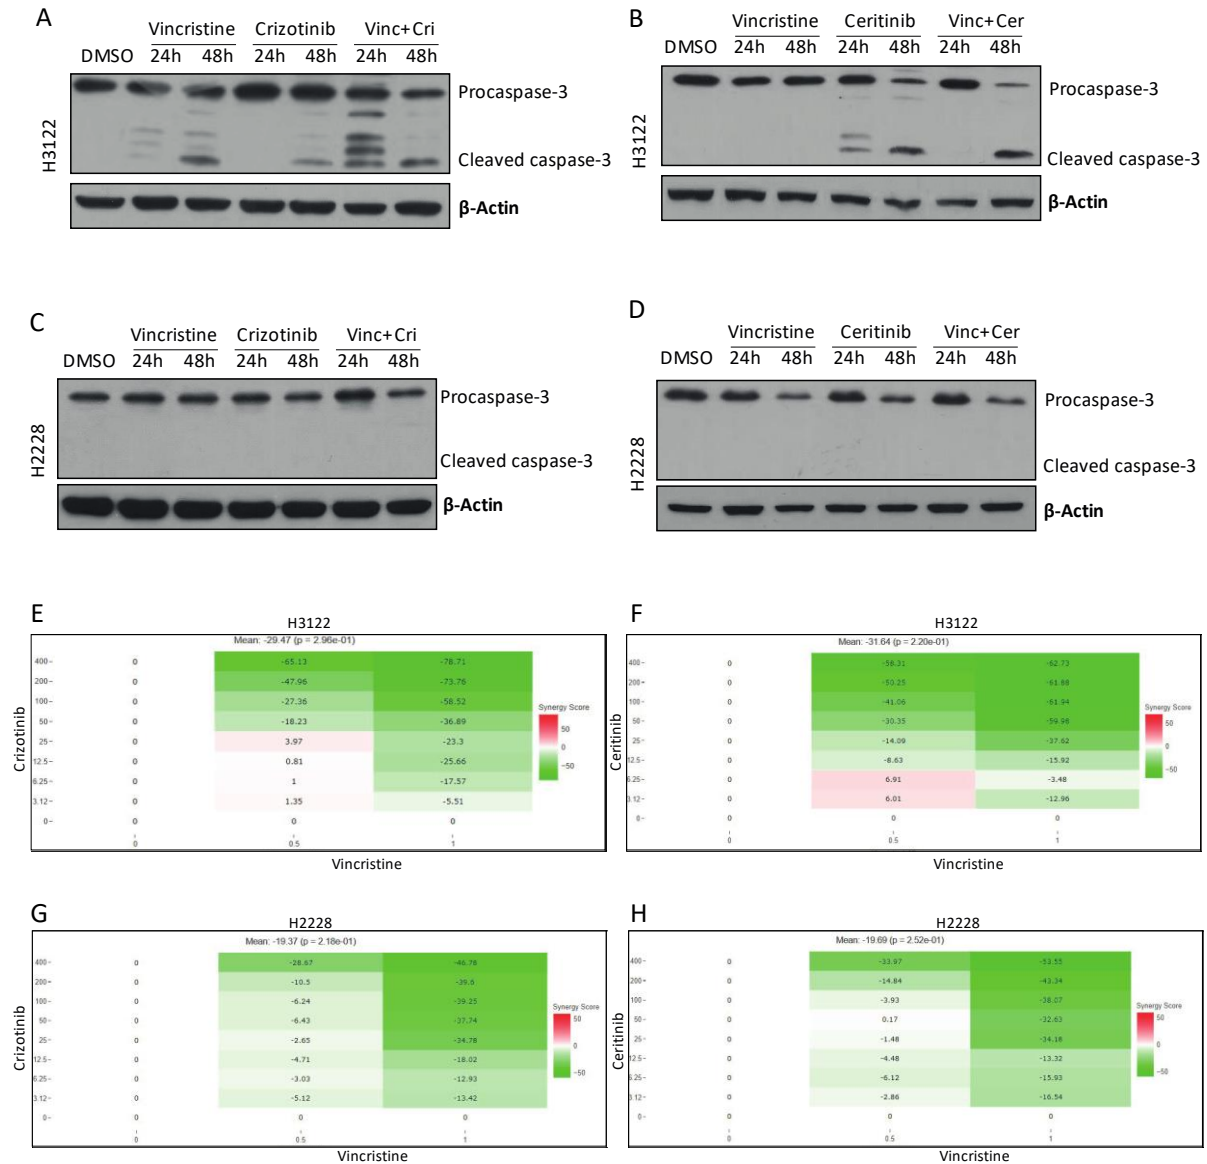

**Figure S2. High expression levels of apoptotic proteins upon vincristine and ceritinib treatments in H3122, but not in H2228**

**A, B.** H3122, **C, D.** H2228 cell lines were treated with the indicated drugs (400 nM crizotinib; 400 nM ceritinib; 20 nM vincristine) for either 24 or 48 hours. Western blotting analysis for the indicated proteins was performed.  $\beta$ -actin was used as a loading control. **E-H.** Heatmaps summarizing the sensitization effects of vincristine and ALK-TKIs, crizotinib and ceritinib. Data were analysed by SynergyFinder software 2.0. The score of  $< 0$  (green) confers additive effect, whereas the score of  $> 0$  (red) confers sensitivity.

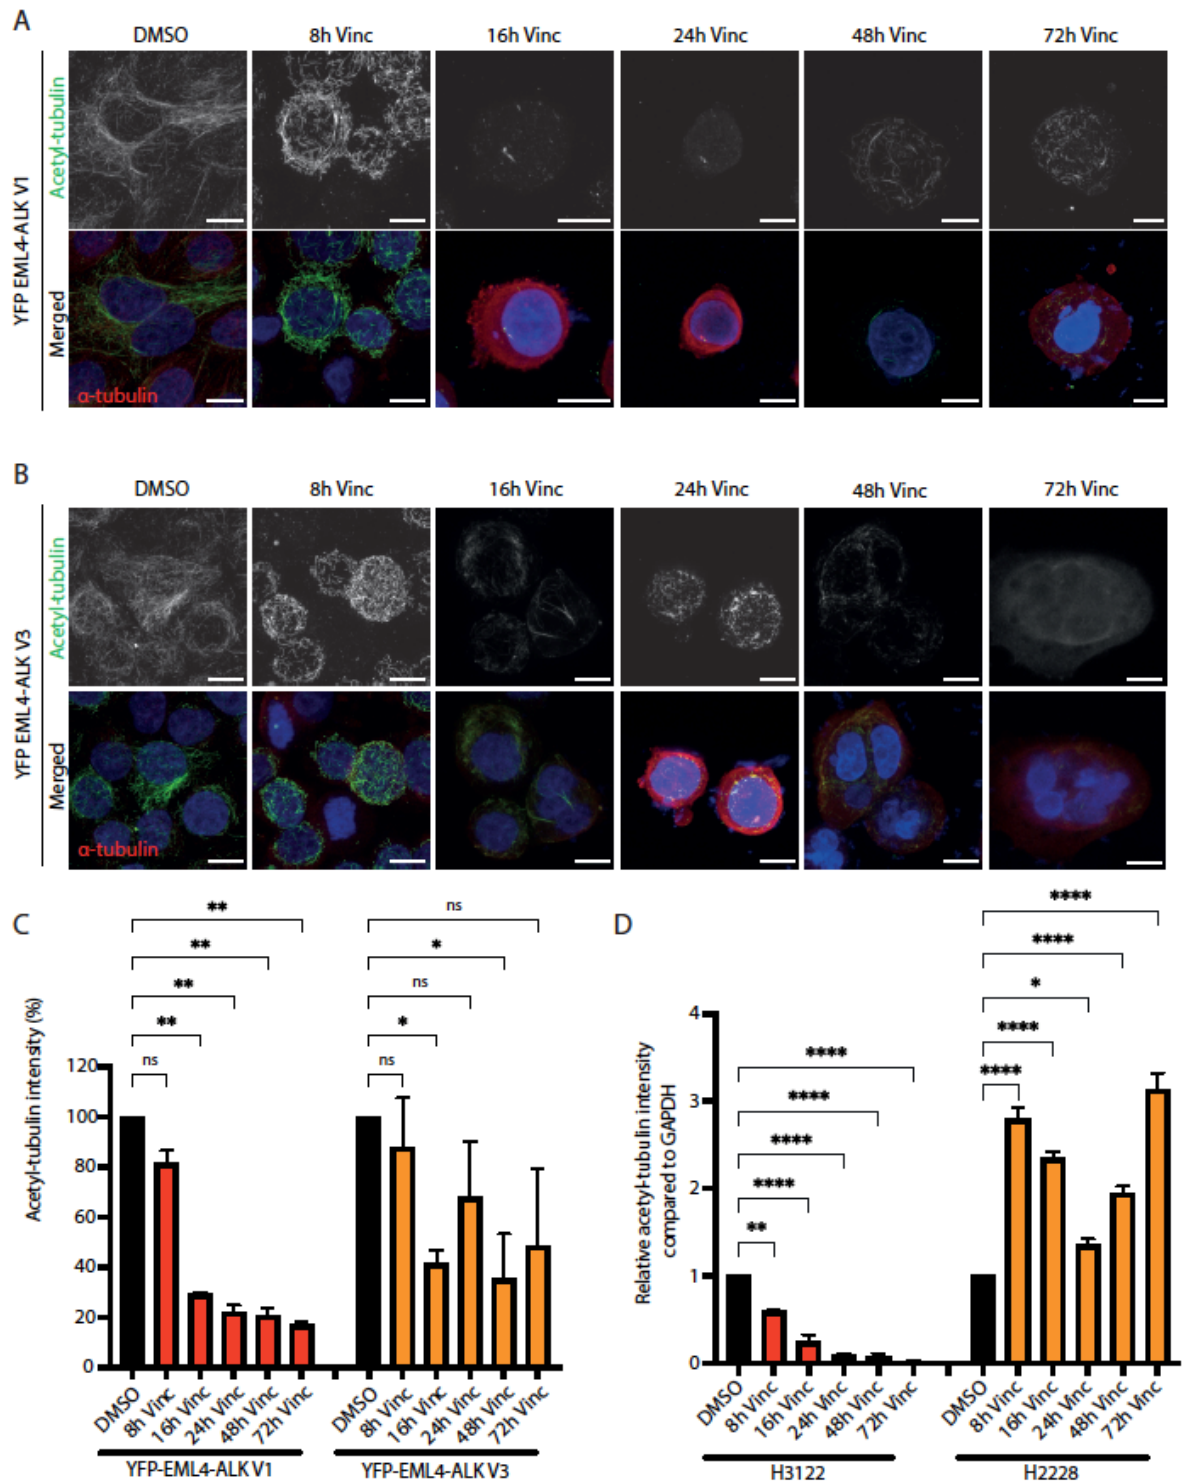

**Figure S3. EML4-ALK V3 cells, but not V1, express high levels of acetylated tubulin upon vincristine treatment**

**A, B.** HeLa cells were transfected with either YFP-EML4-ALK V1 or V3 constructs for 48 hours and treated with vincristine at the indicated time points. Cells were fixed and stained with anti-acetylated tubulin (green), anti- $\alpha$ -tubulin (red), and DAPI (blue). Scale bars, 10  $\mu$ m. **C.** Box plot shows the intensity of acetylated tubulin from A and B. Data represent counts from >15 cells, the bars denote  $\pm$ SD,  $n=2$ . **D.** Acetylated tubulin band intensity was quantified relative to GAPDH from Figure 4D. Box plot graph is representative of two biological replicates, the bars denote  $\pm$ SD.

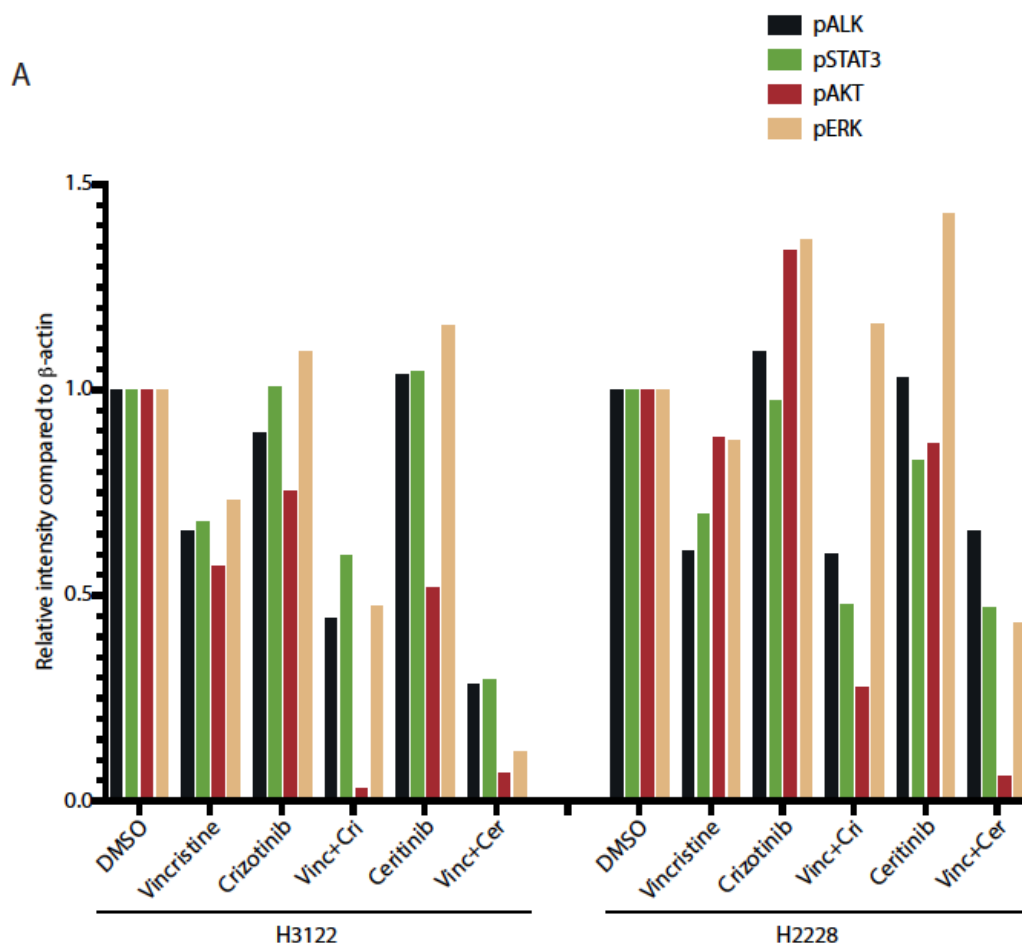

**Figure S4. Vincristine and ALK-TKIs inhibit signalling pathways in EML4-ALK-positive cells A.** H3122 and H2228 cell lines were treated with the indicated drugs (400 nM crizotinib; 400 nM ceritinib; 20 nM vincristine) for 4 hours. Signalling proteins were quantified relative to  $\beta$ -actin. Box plot graph is representative of western blotting analysis from Figure 5A.

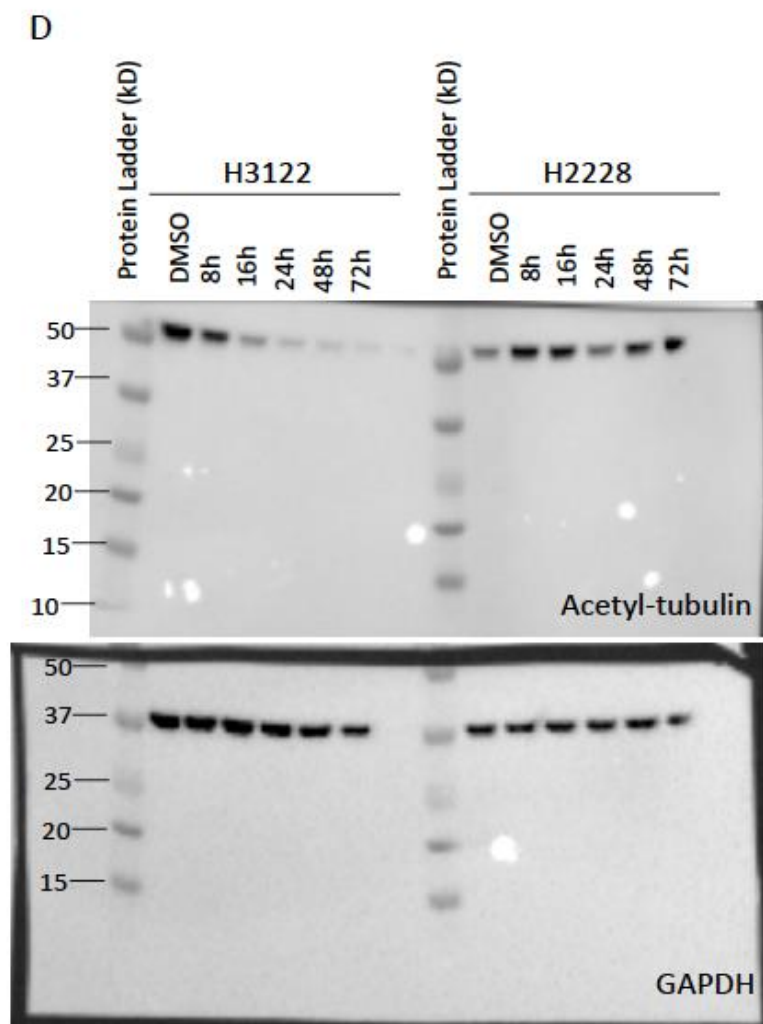

**Figure S5.** Source data of western blotting analysis from Figure 4D.

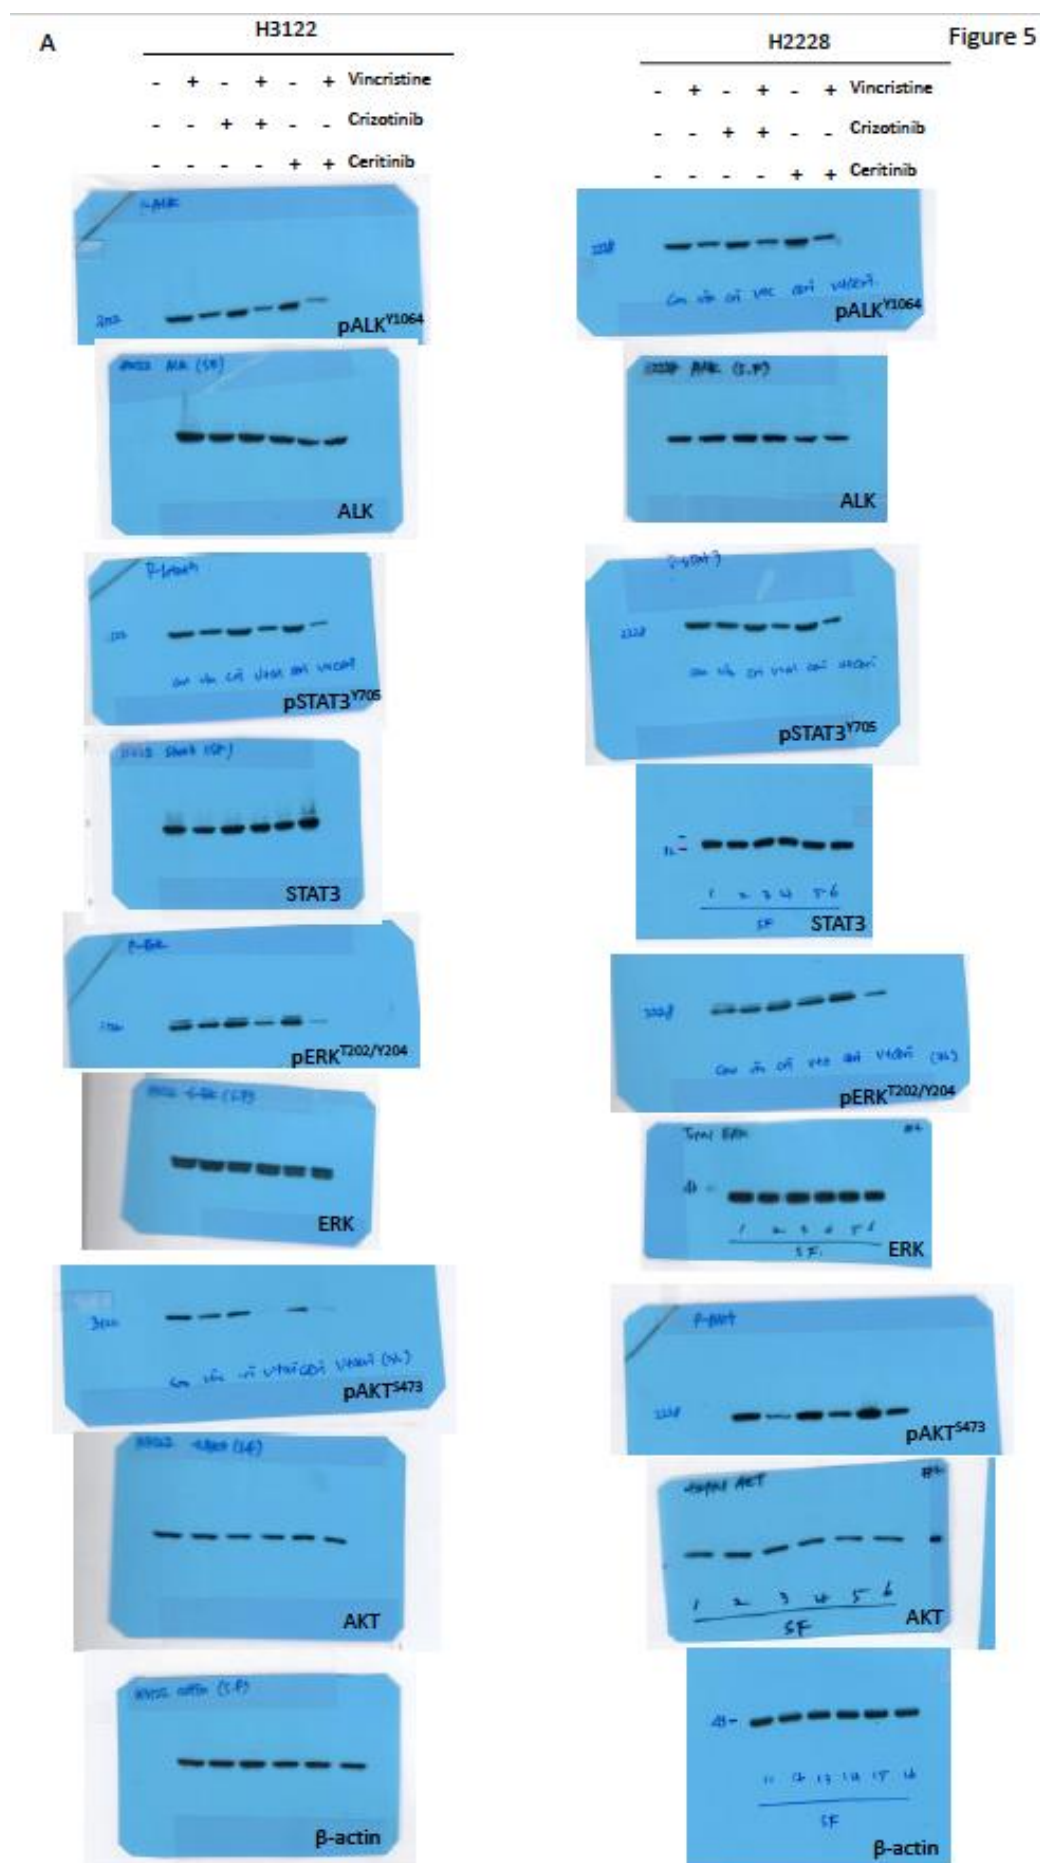

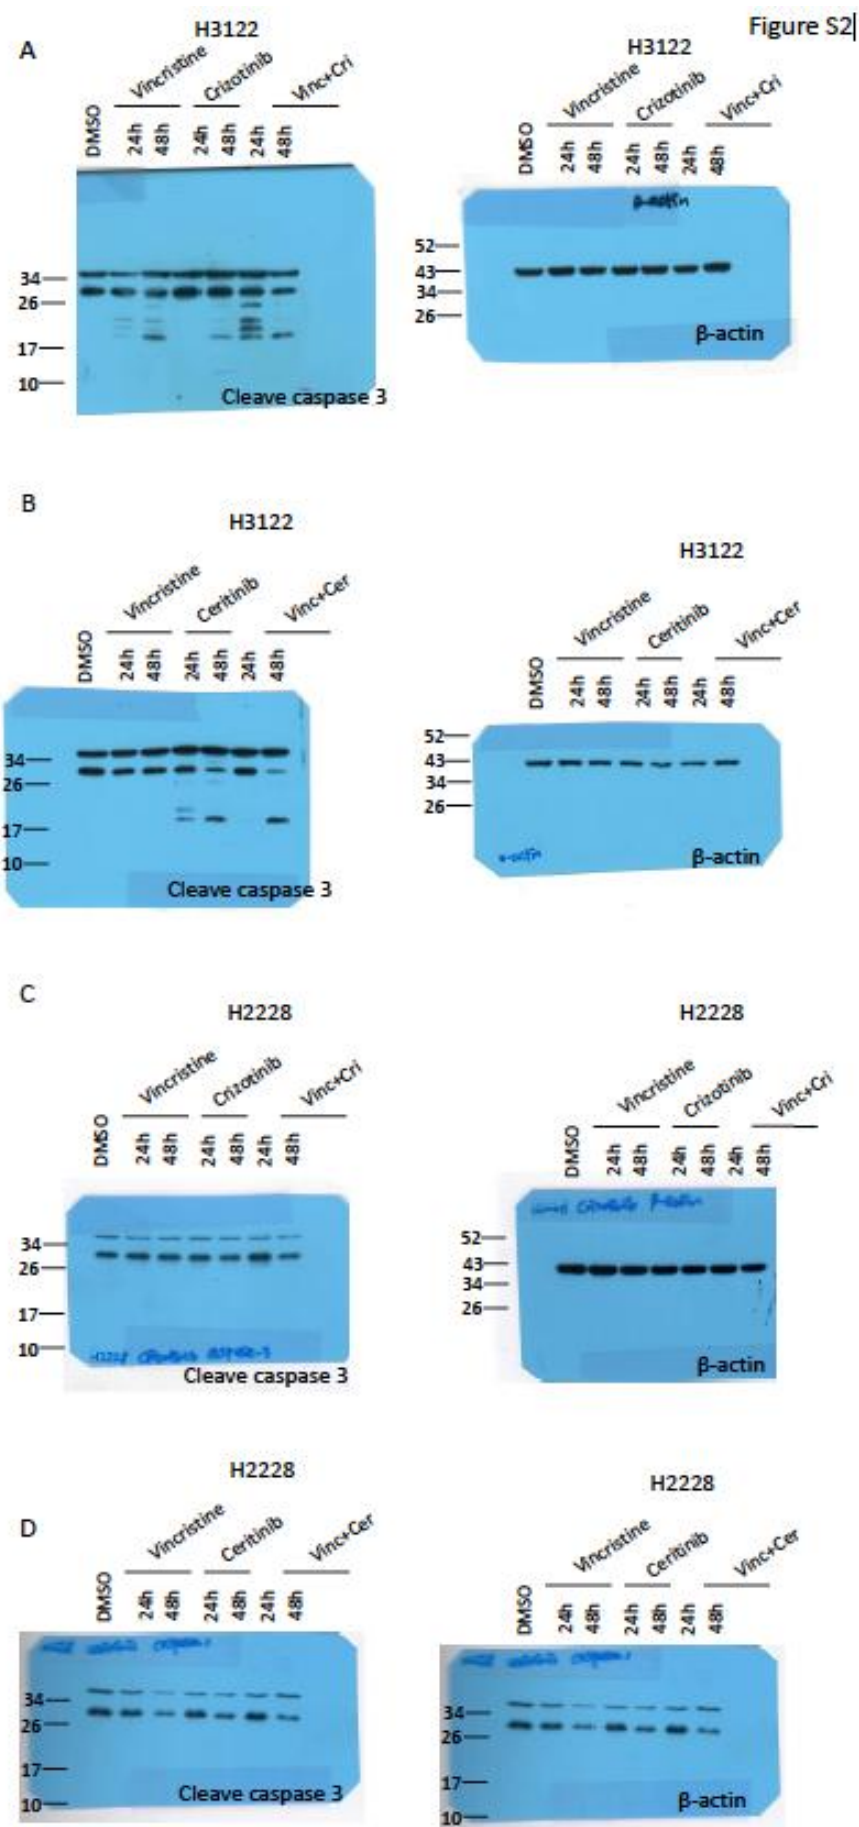

Figure S5 continued. Source data of western blotting analysis from Figure S2A-D.
